# Supplementary material for: An unprecedented α-C–C agostic interaction in a cyclopropyl tris(pyrazolyl)boratoniobium complexElectronic supplementary information (ESI) available: experimental section. See http://www.rsc.org/suppdata/cc/b3/b300324h/
Source: Royal Society of Chemistry journal article supplement (doi:10.1039/b300324h), 2003-03-05
Supplement: b300324h.doc [file b300324h.doc]

Electronic Supporting Information for *Chemical Communications*

An unprecedented -C–C agostic interaction in a cyclopropyl tris(pyrazolyl)boratoniobium complex

J. Jaffart, M. Etienne, M. Reinhold, J.E. McGrady and F. Maseras

**Experimental section.**

All experiments were carried out under a dry dinitrogen atmosphere using either Schlenck tube or glove box techniques. Diethylether was obtained after refluxing purple solutions of Na/benzophenone under dinitrogen. Toluene, hexane, pentane and 1,4-dioxane were dried by refluxing over CaH2 under dinitrogen. Benzene-*d6*was dried over molecular sieves, degassed by freeze-pump-thaw cycles and stored under dinitrogen. 1H and 13C NMR spectra were obtained on Bruker DPX 300 spectrometer. Only pertinent *1JCH* are quoted in the 13C spectra. Elemental analyses were performed in the Analytical Service of our Laboratory.

**TpMe2NbCl(*c*-C3H5)(MeCCMe)**. 1,4-Dioxane (2 mL) was added to a solution of (*c*-C3H5)MgBr in diethylether (20 mL, 0.076 M, prepared from Mg turnings and *c*-C3H5Br in diethyl ether) yielding an abundant precipitate. After decantation, 10 mL of this solution were added dropwise via syringe to a cooled (-20°C, ethanol/liquid nitrogen bath) diethylether solution (30 mL) of TpMe2NbCl2(MeCCMe) (0.250 g, 0.49 mmol). The color of the solution gradually changed from purple-red to yellow-orange as the temperature slowly rose to room temperature. Stirring was maintained for *ca* 1h. The resulting slurry was filtered through a pad of Celite to give a clear yellow-orange solution which was evaporated to dryness. The residue was dissolved in a minimum amount of toluene (*ca* 2 mL). Addition of hexane (*ca* 10 mL) followed by paper filtration yielded orange crystals (0°C, overnight) which were collected by filtration, washed with small amounts of cold pentane and dried under vacuum (0.200 g, 0.39 mmol, 78%).

**TpMe2NbCl(*c*-C3H5)(MeCCMe)**. Anal. found: C 50.37, H 6.38, N 15.89 ; C22H33N6BClNb requires: C 50.84, H 6.35, N 16.18. 1H NMR (300 MHz, benzene-*d6*, 300 K)  5.73, 5.70, 5.46 (s, 1 H each, TpMe2*CH*), 3.11, 2.18 (s, 3 H each, *Me*CC*Me*), 2.82, 2.21, 2.10, 2.06, 2.03, 1.92 (s, 3 H each, TpMe2*Me*), 2.24, 1.53, 1.26, 0.95 (m, 2, 1, 1, 1 H each respectively, C*H2* , C*H2'* and C*H*). RMN 13C (75 MHz, benzene-*d6*, 300 K) Me*C**C*Me), 153.3, 151.6, 144.0, 143.9, 143.8 (1, 2, 1, 1, 1, TpMe2*C*Me), 108.2, 107.8, 107.7 (TpMe2*C*H), 75.3 (d, 1JCH 139 Hz, 1/2 = 20 Hz, *C*H23.2, 13.8 (t each, 1JCH 159 Hz, *C*H2 et *C*'H2), 21.9, 20.8, 16.4, 15.8, 15.1, 13.2, 13.0, 12.7 (TpMe2C*Me* and *Me*CC*Me*).

**TpMe2NbBr(*c*-C3H5)(MeCCMe).** Anal found: C 47.54, H 5.96, N 14.80 ; C22H33N6BBrNb requires: C 46.76, H 5.84, N 14.88. RMN 1H (300 MHz, benzene-*d6*, 300 K) 5.76, 5.70, 5.46 (s, 1 H each, TpMe2*CH*), 3.23, 2.15 (s, 3 H each, *Me*CC*Me*), 2.85, 2.21, 2.10, 2.03, 2.02, 1.90 (s, 3 H each, TpMe2*Me*), 2.34, 2.24, 1.49, 1.25, 0.87 (m, 1 H each, C*H2* , C*H2'* and C*H*). RMN 13C (75 MHz, benzene-*d6*, 300 K) Me*C**C*Me), 153.7, 151.7, 151.6, 144.3, 144.1, 143.8 (TpMe2*C*Me), 108.4, 107.9, 107.8 (TpMe2*C*H), 79.3 (broad d, 1JCH = 139 Hz, 1/2 = 15 Hz, *C*H24.1, 13.7 (t each, 1JCH = 159 Hz, *C*H2 et *C*'H2), 22.3, 21.8, 17.3, 15.9, 15.8, 13.2, 13.0, 12.7 (TpMe2C*Me* and *Me*CC*Me*).
